# Supplementary material for: Computer simulation of water desalination through boron nitride nanotubes
Source: Royal Society of Chemistry journal article supplement (doi:10.1039/c7cp06230c), 2017-01-01
Supplement: c7cp06230c1.pdf [file c7cp06230c1.pdf]

## Supplementary Information

### Computer simulation of water desalination through boron nitride nanotubes

Lijun Liang<sup>1,#</sup>, Jia-Chen Li<sup>2,#</sup>, Li Zhang<sup>2</sup>, Zhisen Zhang<sup>3</sup>, Jia-Wei Shen<sup>4,\*</sup>, Lihua Li<sup>1,\*</sup>,  
Jianyang Wu<sup>3</sup>

<sup>1</sup>College of Life Information Science and Instrument Engineering, Hangzhou Dianzi University, Hangzhou, People's Republic of China

<sup>2</sup>Department of Chemistry, Zhejiang Sci-Tech University, Hangzhou, People's Republic of China

<sup>3</sup>Research Institute for Biomimetic and Soft Matter, Fujian Provincial Key Laboratory of Soft Functional Materials, Department of Physics, Xiamen University, Xiamen, 361005, People's Republic of China

<sup>4</sup>School of Medicine, Hangzhou Normal University, Hangzhou 310016, People's Republic of China

\* Corresponding authors.

Tel: +86-571-2886-5674; Fax: +86-571-2886-9344 (J.W. Shen)

E-mail addresses: [shen.jiawei@hotmail.com](mailto:shen.jiawei@hotmail.com); [lilh@hdu.edu.cn](mailto:lilh@hdu.edu.cn)

#L.L. and J. L contributed equally to this manuscript.

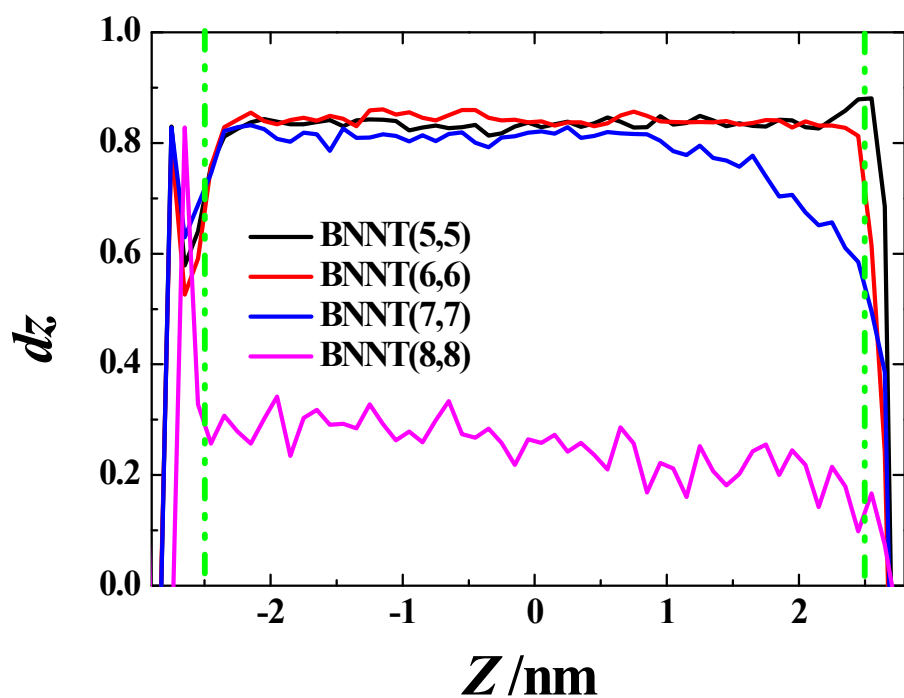

Figure S1. Water dipole as a function of  $z$ -position in all studied BNNTs. The dash green lines represent the location of two ends of BNNTs.

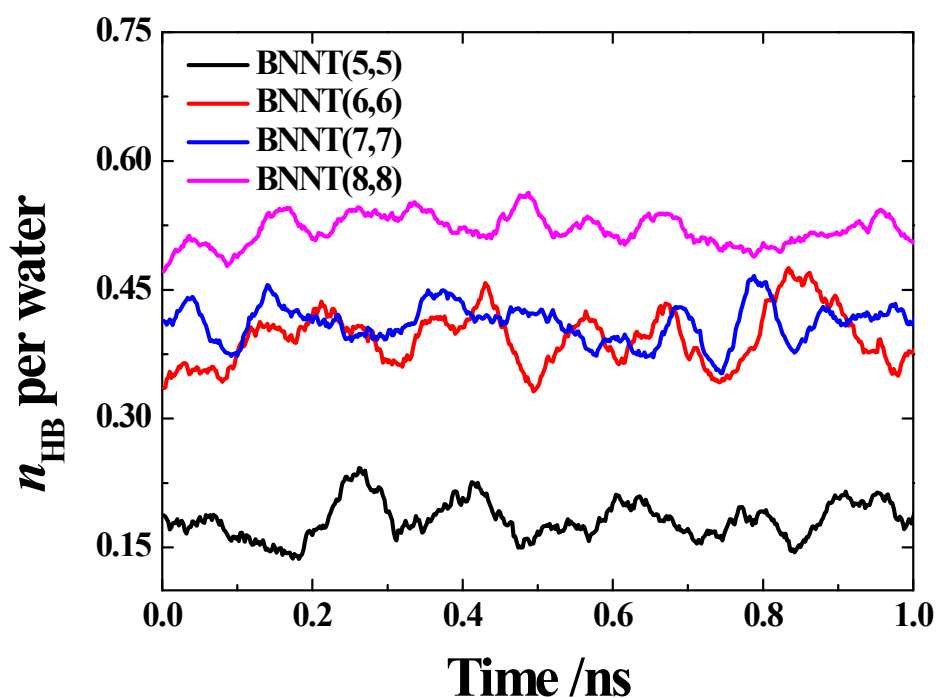

Figure S2. Number of hydrogen bonds per water molecule in BNNTs. Data were taken from the last 1 ns trajectories.
